# Supplementary material for: Functional divergence and intron variability during evolution of angiosperm TERMINAL FLOWER1 (TFL1) genes
Source: PubMed Central journal article supplement (PMC5666015; doi:10.1038/s41598-017-13645-0), 2017-11-01
Supplement: 41598_2017_13645_MOESM1_ESM.pdf [file 41598_2017_13645_MOESM1_ESM.pdf]

Functional divergence and intron variability during evolution of angiosperm  
*TERMINAL FLOWER1 (TFL1)* genes

Jian Gao<sup>1</sup>, Bing-Hong Huang<sup>2</sup>, Yu-Ting Wan<sup>2</sup>, JenYu Chang<sup>3</sup>, Jun-Qing Li<sup>1</sup>, Pei-Chun Liao<sup>2,\*</sup>

<sup>1</sup> College of Forestry, Beijing Forestry University, No.35, Tsinghua East Rd.,  
Haidian Dist., Beijing 100083, People's Republic of China

<sup>2</sup> Department of Life Science, National Taiwan Normal University, No.88, Sec. 4,  
Tingzhou Rd., Wunshan Dist., Taipei 116, Taiwan, Republic of China

<sup>3</sup> Department of Horticulture, Chiayi Agricultural Experiment Branch, Taiwan  
Agricultural Research Institute, No.1, Nung-Kai-Chang, Lutsao township,  
Chiayi 611, Taiwan, Republic of China

Email address:

Jian Gao: gaojian5688@163.com

Bing-Hong Huang: sohjiro4321@yahoo.com.tw

Yu-Ting Wan: myet556610@gmail.com

JenYu Chang: ychang@dns.caes.gov.tw

Jun-Qing Li: lijq@bjfu.edu.cn

Pei-Chun Liao: pcliao@ntnu.edu.tw

\* Corresponding Author: Dr. Pei-Chun Liao

ORCID: [orcid.org/0000-0003-1733-5504](https://orcid.org/0000-0003-1733-5504)

Email: [pcliao@ntnu.edu.tw](mailto:pcliao@ntnu.edu.tw)

Tel: +886-2-77346330

Fax: +886-2-29312904

**Table S1** List of conserved motifs with identical sequences of putative *cis*-acting elements found in the introns of angiosperm *TFL1/CEN/RCNs* paralogs

| <i>Cis</i> -acting element | Motif                   | Putative function                                                       | Reference                |
|----------------------------|-------------------------|-------------------------------------------------------------------------|--------------------------|
| TATA box                   | TATAAAT                 | Core promoter element approximately 30 bp of transcription start        | (Fu et al., 2014)        |
| ABRE                       | TACGTG                  | <i>cis</i> -Acting element involved in the abscisic acid responsiveness | (Fu et al., 2014)        |
| AE box                     | AGAAACA<br>A            | Part of a module for light response                                     | (Fu et al., 2014)        |
| ARE                        | TGGTTT                  | <i>cis</i> -Acting regulatory element essential for anaerobic induction | (Fu et al., 2014)        |
| Box I                      | TTTCAA                  | Light responsive element                                                | (Fu et al., 2014)        |
| CAAT box                   | CAAT/CA<br>TT           | <i>cis</i> -Acting element in promoter and enhancer regions             | (Fu et al., 2014)        |
| G box                      | CACGTA                  | <i>cis</i> -Acting regulatory element involved in light responsiveness  | (Fu et al., 2014)        |
| MBS                        | TAACTG                  | MYB binding site involved in drought-inducibility                       | (Fu et al., 2014)        |
| ACG box                    | AACGTT                  | Unknown                                                                 | (Tsaftaris et al., 2012) |
| CCAAT box                  | CCAAT                   | Unknown                                                                 | (Tsaftaris et al., 2012) |
| CArG box                   | CC[A/T] <sub>6</sub> GG | AP1 binding                                                             | (West et al., 1997)      |
| LFY binding site           | CCAGTG                  | LEAFY binding                                                           | (Benlloch et al., 2011)  |
| WRKY                       | TGAC                    | Transcriptional reprogramming regulation; regulate seed germination     | (Randoux et al., 2012)   |

**Table S2** Exon and intron lengths of angiosperm *TFLI/CEN/RCNs* paralogs

|                                             | Paralog     | Intron 1 | Intron 2 | Intron 3 | Intron total | Exon 1 | Exon 2 | Exon 3 | Exon 4 | Exon total | Full length |
|---------------------------------------------|-------------|----------|----------|----------|--------------|--------|--------|--------|--------|------------|-------------|
| Lindera megaphylla f megaphylla TFL1 2042a2 | Magnoliids  | 137      | 2187     | 1190     | 3514         | 201    | 62     | 41     | 218    | 522        | 4036        |
| Liriodendron TFL1                           | Magnoliids  | 141      | 2292     | 1106     | 3539         | 201    | 62     | 41     | 218    | 522        | 4061        |
| Arabidopsis lyrata ATC NW 003302551         | <i>CEN</i>  | 326      | 119      | 92       | 537          | 204    | 62     | 41     | 221    | 528        | 1065        |
| Arabidopsis lyrata ATC NW 003302552         | <i>CEN</i>  | 326      | 119      | 92       | 537          | 123    | 62     | 41     | 221    | 447        | 984         |
| Arabidopsis thaliana ATC NC 003071.7        | <i>CEN</i>  | 353      | 118      | 94       | 565          | 204    | 62     | 41     | 221    | 528        | 1093        |
| Citrus clementina CEN NW 006262022          | <i>CEN</i>  | 92       | 393      | 101      | 586          | 204    | 62     | 41     | 221    | 528        | 1114        |
| Coffea arabica Scaffold 2016 1394           | <i>CEN</i>  | 121      | 906      | 108      | 1135         | 201    | 62     | 41     | 218    | 522        | 1657        |
| Fragaria vesca tfl1 2                       | <i>CEN</i>  | 88       | 442      | 95       | 625          | 210    | 62     | 41     | 218    | 531        | 1156        |
| Fragaria vesca tfl1 NC 020492               | <i>CEN</i>  | 81       | 146      | 93       | 320          | 201    | 62     | 41     | 218    | 522        | 842         |
| Kalanchoe fedtschenkoi Kaladp0093s0128 exon | <i>CEN</i>  | 130      | 195      | 132      | 457          | 204    | 62     | 41     | 221    | 528        | 985         |
| Lactuca sativa Lsat 1 v5 gn 2 96360         | <i>CEN</i>  | 194      | 1509     | 1570     | 3273         | 192    | 62     | 41     | 218    | 513        | 3786        |
| Medicago truncatula TFL1 NC 016408.1        | <i>CEN</i>  | 136      | 1102     | 111      | 1349         | 198    | 62     | 41     | 221    | 522        | 1871        |
| Mimulus guttatus MigutN02493                | <i>CEN</i>  | 133      | 267      | 117      | 517          | 183    | 62     | 41     | 227    | 513        | 1030        |
| Salix purpurea SapurV1A0374s0110            | <i>CEN</i>  | 151      | 206      | 138      | 495          | 201    | 62     | 41     | 218    | 522        | 1017        |
| Vigna unguiculata Vigun07g059700            | <i>CEN</i>  | 136      | 331      | 90       | 557          | 201    | 62     | 41     | 218    | 522        | 1079        |
| Vitis vinifera CEN                          | <i>CEN</i>  | 83       | 467      | 107      | 657          | 201    | 62     | 41     | 218    | 522        | 1179        |
| Aquilegia coerulea CEN Aquca 072 00150      | <i>TFLI</i> | 104      | 651      | 109      | 864          | 201    | 62     | 41     | 221    | 525        | 1389        |
| Arabidopsis lyrata tfl1 NW 003302550        | <i>TFLI</i> | 226      | 186      | 84       | 496          | 210    | 62     | 41     | 221    | 534        | 1030        |
| Arabidopsis thaliana TFL1 NC 003076.8       | <i>TFLI</i> | 210      | 206      | 87       | 503          | 210    | 62     | 41     | 221    | 534        | 1037        |
| Citrus clementina TFL1 NW 006262139         | <i>TFLI</i> | 122      | 673      | 140      | 935          | 201    | 62     | 41     | 218    | 522        | 1457        |
| Coffea arabica Scaffold 571 632             | <i>TFLI</i> | 113      | 602      | 213      | 928          | 198    | 62     | 41     | 218    | 519        | 1447        |
| Coffea arabica Scaffold 671 1367            | <i>TFLI</i> | 113      | 573      | 213      | 899          | 198    | 62     | 41     | 218    | 519        | 1418        |
| Fragaria vesca tfl1 NC 020496               | <i>TFLI</i> | 88       | 442      | 95       | 625          | 198    | 62     | 41     | 218    | 519        | 1144        |
| Linum usitatissimum Lus10004884 exon        | <i>TFLI</i> | 532      | 309      | 105      | 946          | 225    | 62     | 41     | 224    | 552        | 1498        |
| Linum usitatissimum Lus10020600             | <i>TFLI</i> | 378      | 279      | 620      | 1277         | 198    | 62     | 41     | 227    | 528        | 1805        |

|                                                |             |     |      |     |      |     |    |     |     |     |      |
|------------------------------------------------|-------------|-----|------|-----|------|-----|----|-----|-----|-----|------|
| Linum usitatissimum Lus10043385                | <i>TFL1</i> | 95  | 446  | 38  | 579  | 201 | 62 | 41  | 239 | 543 | 1122 |
| Medicago truncatula TFL1 NC 016413.1           | <i>TFL1</i> | 330 | 94   | 100 | 524  | 201 | 62 | 41  | 221 | 525 | 1049 |
| Mimulus guttatus MigutJ01049                   | <i>TFL1</i> | 118 | 351  | 115 | 584  | 210 | 62 | 41  | 230 | 543 | 1127 |
| Solanum lycopersicum CEN                       | <i>TFL1</i> | 531 | 1003 | 514 | 2048 | 199 | 62 | 41  | 217 | 519 | 2567 |
| Solanum tuberosum CEN like1                    | <i>TFL1</i> | 542 | 734  | 601 | 1877 | 200 | 62 | 44  | 213 | 519 | 2396 |
| Trifolium pratense Tp57577 mRNA20217           | <i>TFL1</i> | 605 | 105  | 0   | 710  | 201 | 62 |     | 346 | 609 | 1319 |
| Trifolium pratense Tp57577 mRNA20217           | <i>TFL1</i> | 241 | 636  | 184 | 1061 | 201 | 62 | 101 | 221 | 585 | 1646 |
| Vigna unguiculata Vigun01g173000               | <i>TFL1</i> | 212 | 433  | 122 | 767  | 201 | 62 | 41  | 218 | 522 | 1289 |
| Ananas comosus Aco016718                       | monocot     | 162 | 280  | 150 | 592  | 100 | 62 | 41  | 244 | 447 | 1039 |
| Ananas comosus Aco031443                       | monocot     | 94  | 633  | 252 | 979  | 201 | 62 | 41  | 218 | 522 | 1501 |
| Musa acuminata GSMUA Achr10T15580 001          | monocot     | 83  | 194  | 279 | 556  | 201 | 62 | 41  | 218 | 522 | 1078 |
| Musa acuminata GSMUA Achr3T03070 001           | monocot     | 96  | 159  | 187 | 442  | 201 | 62 | 41  | 218 | 522 | 964  |
| Musa acuminata GSMUA Achr8T07730 001           | monocot     | 79  | 251  | 76  | 406  | 204 | 62 | 41  | 221 | 528 | 934  |
| Zostera marina Zosma2g00820                    | monocot     | 86  | 86   | 87  | 259  | 201 | 62 | 41  | 218 | 522 | 781  |
| Brachypodium distachyon LOC100844217 NC 016134 | <i>RCN1</i> | 100 | 163  | 86  | 349  | 201 | 62 | 41  | 218 | 522 | 871  |
| Oryza sativa Os12g0151900 NC 008404.2          | <i>RCN1</i> | 72  | 213  | 97  | 382  | 201 | 62 | 41  | 218 | 522 | 904  |
| Panicum hallii PahalH00808                     | <i>RCN1</i> | 88  | 127  | 78  | 293  | 201 | 62 | 41  | 218 | 522 | 815  |
| Setaria italica CEN NW 004675967               | <i>RCN1</i> | 86  | 143  | 86  | 315  | 201 | 62 | 41  | 218 | 522 | 837  |
| Setaria italica CEN NW 004675967.1             | <i>RCN1</i> | 134 | 243  | 137 | 514  | 201 | 62 | 41  | 218 | 522 | 1036 |
| Setaria italica tfl1 NW 004675968              | <i>RCN1</i> | 86  | 151  | 79  | 316  | 201 | 62 | 41  | 218 | 522 | 838  |
| Sorghum bicolor SORBIDRAFT 05g003200 NC 012874 | <i>RCN1</i> | 86  | 149  | 86  | 321  | 201 | 62 | 41  | 218 | 522 | 843  |
| Sorghum bicolor SORBIDRAFT 08g003210 NC 012877 | <i>RCN1</i> | 82  | 149  | 81  | 312  | 201 | 62 | 41  | 218 | 522 | 834  |
| Brachypodium distachyon LOC100844906 NC 016133 | <i>RCN2</i> | 151 | 301  | 190 | 642  | 201 | 62 | 41  | 218 | 522 | 1164 |
| Oryza sativa Os02g0531600 NC 008395.2          | <i>RCN2</i> | 117 | 261  | 265 | 643  | 201 | 62 | 41  | 218 | 522 | 1165 |
| Setaria italica CEN NW 004675961               | <i>RCN2</i> | 91  | 291  | 196 | 578  | 201 | 62 | 41  | 218 | 522 | 1100 |
| Sorghum bicolor SORBIDRAFT 04g021650 NC 012873 | <i>RCN2</i> | -   | 296  | 214 | 510  | 263 | -  | 41  | 218 | 522 | 1032 |

|                                                |             |     |     |     |      |     |    |    |     |     |      |
|------------------------------------------------|-------------|-----|-----|-----|------|-----|----|----|-----|-----|------|
| Brachypodium distachyon LOC100835593 NC 016135 | <i>RCN3</i> | 108 | 292 | 130 | 530  | 201 | 62 | 41 | 218 | 522 | 1052 |
| Oryza sativa Os04g0411400 NC 008397            | <i>RCN3</i> | 179 | 613 | 215 | 1007 | 201 | 62 | 41 | 218 | 522 | 1529 |
| Sorghum bicolor SORBIDRAFT 06g015490 NC 012875 | <i>RCN3</i> | 170 | 187 | 152 | 509  | 201 | 62 | 41 | 218 | 522 | 1031 |
| Amborella trichopoda TFL1 GSVIVT01033829001    | Basal       | 651 | 655 | 138 | 1444 | 201 | 62 | 41 | 212 | 516 | 1960 |

---

**Table S3** Types and numbers of putative *cis*-acting elements in intron 1~3 of angiosperm *TFL1/CEN/RCNs* paralogs

| Taxa                                                  | Paralog     | TATA box |          |          | ABRE     |          |          | ARE      |          |          | Box I    |          |          | CAAT box  |           |           | G box    |          |          | MBS      |          |          | ACG box  |          |          | CCAAT box |           |          | CArG box |           |          | LFY bs   |          |          | WRKY      |           |           | Total |
|-------------------------------------------------------|-------------|----------|----------|----------|----------|----------|----------|----------|----------|----------|----------|----------|----------|-----------|-----------|-----------|----------|----------|----------|----------|----------|----------|----------|----------|----------|-----------|-----------|----------|----------|-----------|----------|----------|----------|----------|-----------|-----------|-----------|-------|
|                                                       |             | I1       | I2       | I3       | I1       | I2       | I3       | I1       | I2       | I3       | I1       | I2       | I3       | I1        | I2        | I3        | I1       | I2       | I3       | I1       | I2       | I3       | I1       | I2       | I3       | I1        | I2        | I3       | I1       | I2        | I3       | I1       | I2       | I3       |           |           |           |       |
| <i>Lindera megaphylla</i> TFL1 2042a2                 | Magnoliids  | 0        | 0        | 0        | 0        | 0        | 0        | 3        | 0        | 0        | 0        | 3        | 0        | 0         | 7         | 6         | 0        | 0        | 0        | 0        | 1        | 0        | 0        | 0        | 1        | 0         | 7         | 0        | 1        | 5         | 1        | 0        | 0        | 0        | 0         | 6         | 9         | 50    |
| <i>Liriodendron</i> TFL1                              | Magnoliids  | 0        | 0        | 1        | 0        | 0        | 0        | 0        | 0        | 0        | 0        | 0        | 0        | 1         | 15        | 6         | 0        | 0        | 1        | 0        | 0        | 0        | 0        | 1        | 1        | 0         | 2         | 1        | 0        | 2         | 1        | 0        | 0        | 2        | 0         | 26        | 8         | 68    |
| <i>Arabidopsis lyrata</i> tfl1 NW 003302550           | <i>TFL1</i> | 1        | 1        | 0        | 0        | 0        | 0        | 0        | 0        | 0        | 0        | 0        | 0        | 2         | 3         | 0         | 0        | 0        | 0        | 0        | 0        | 0        | 0        | 0        | 0        | 0         | 0         | 0        | 0        | 0         | 0        | 0        | 0        | 0        | 2         | 1         | 0         | 10    |
| <i>Arabidopsis thaliana</i> TFL1 NC 003076.8          | <i>TFL1</i> | 1        | 0        | 0        | 0        | 0        | 0        | 1        | 0        | 0        | 0        | 0        | 0        | 1         | 1         | 0         | 0        | 0        | 0        | 0        | 0        | 0        | 0        | 0        | 0        | 0         | 0         | 0        | 0        | 0         | 0        | 0        | 0        | 0        | 0         | 1         | 0         | 5     |
| <i>Citrus clementina</i> TFL1 NW 006262139            | <i>TFL1</i> | 0        | 1        | 0        | 0        | 0        | 0        | 0        | 0        | 0        | 0        | 0        | 0        | 1         | 3         | 1         | 0        | 0        | 0        | 0        | 0        | 0        | 0        | 0        | 0        | 0         | 1         | 0        | 0        | 0         | 0        | 0        | 0        | 0        | 0         | 4         | 1         | 12    |
| <i>Fragaria vesca</i> tfl1 NC 020496                  | <i>TFL1</i> | 0        | 0        | 0        | 0        | 0        | 0        | 0        | 0        | 0        | 0        | 0        | 0        | 1         | 5         | 0         | 0        | 1        | 0        | 0        | 0        | 0        | 0        | 0        | 0        | 0         | 1         | 0        | 0        | 0         | 0        | 0        | 0        | 0        | 0         | 5         | 0         | 13    |
| <i>Medicago truncatula</i> TFL1 NC 016413.1           | <i>TFL1</i> | 0        | 0        | 0        | 0        | 0        | 0        | 0        | 0        | 0        | 0        | 0        | 0        | 1         | 0         | 0         | 0        | 0        | 0        | 0        | 0        | 0        | 0        | 0        | 0        | 0         | 0         | 0        | 0        | 0         | 0        | 0        | 0        | 0        | 1         | 0         | 1         | 3     |
| <i>Arabidopsis lyrata</i> ATC NW 003302551            | <i>CEN</i>  | 0        | 0        | 0        | 1        | 0        | 0        | 0        | 0        | 0        | 1        | 0        | 0        | 0         | 2         | 0         | 1        | 0        | 0        | 1        | 0        | 0        | 0        | 0        | 0        | 0         | 0         | 0        | 1        | 0         | 0        | 0        | 0        | 0        | 3         | 1         | 0         | 11    |
| <i>Arabidopsis thaliana</i> ATC NC 003071.7           | <i>CEN</i>  | 1        | 0        | 0        | 1        | 0        | 0        | 0        | 0        | 0        | 1        | 0        | 0        | 0         | 1         | 0         | 1        | 0        | 0        | 1        | 0        | 0        | 0        | 0        | 0        | 0         | 0         | 0        | 0        | 0         | 0        | 0        | 0        | 0        | 4         | 1         | 0         | 11    |
| <i>Arabidopsis lyrata</i> ATC NW 003302552            | <i>CEN</i>  | 1        | 1        | 0        | 1        | 0        | 0        | 0        | 0        | 0        | 1        | 0        | 0        | 0         | 2         | 0         | 1        | 0        | 0        | 1        | 0        | 0        | 0        | 0        | 0        | 0         | 0         | 0        | 0        | 0         | 0        | 0        | 0        | 0        | 3         | 1         | 0         | 12    |
| <i>Citrus clementina</i> CEN NW 006262022             | <i>CEN</i>  | 0        | 0        | 0        | 0        | 0        | 0        | 0        | 0        | 0        | 0        | 0        | 0        | 0         | 2         | 1         | 0        | 1        | 0        | 0        | 0        | 0        | 0        | 0        | 0        | 0         | 0         | 0        | 0        | 1         | 1        | 0        | 0        | 0        | 0         | 2         | 0         | 8     |
| <i>Fragaria vesca</i> tfl1 NC 020492                  | <i>CEN</i>  | 0        | 0        | 0        | 0        | 0        | 0        | 0        | 0        | 0        | 0        | 0        | 0        | 1         | 0         | 0         | 0        | 0        | 0        | 0        | 1        | 0        | 0        | 0        | 0        | 1         | 0         | 0        | 0        | 0         | 0        | 0        | 0        | 0        | 0         | 0         | 1         | 4     |
| <i>Medicago truncatula</i> TFL1 NC 016408.1           | <i>CEN</i>  | 0        | 1        | 0        | 0        | 0        | 0        | 0        | 0        | 0        | 0        | 0        | 0        | 1         | 9         | 1         | 0        | 0        | 0        | 0        | 0        | 0        | 0        | 0        | 0        | 0         | 3         | 0        | 0        | 1         | 2        | 0        | 0        | 0        | 1         | 7         | 1         | 27    |
| <i>Setaria italica</i> CEN NW 004675967               | <i>RCN1</i> | 0        | 0        | 0        | 0        | 0        | 0        | 0        | 0        | 0        | 0        | 0        | 0        | 0         | 0         | 0         | 0        | 0        | 0        | 0        | 0        | 0        | 0        | 0        | 0        | 0         | 0         | 0        | 0        | 0         | 0        | 0        | 0        | 0        | 1         | 0         | 0         | 1     |
| <i>Sorghum bicolor</i> SORBIDRAFT 05g003200 NC 012874 | <i>RCN1</i> | 0        | 0        | 0        | 0        | 0        | 0        | 0        | 0        | 0        | 0        | 0        | 0        | 0         | 1         | 2         | 0        | 0        | 0        | 0        | 0        | 0        | 0        | 0        | 0        | 0         | 0         | 0        | 0        | 0         | 0        | 0        | 0        | 0        | 2         | 1         | 0         | 6     |
| <i>Setaria italica</i> tfl1 NW 004675968              | <i>RCN1</i> | 0        | 0        | 0        | 0        | 0        | 0        | 0        | 0        | 0        | 0        | 1        | 0        | 1         | 0         | 0         | 0        | 0        | 0        | 0        | 0        | 0        | 0        | 0        | 0        | 1         | 0         | 0        | 0        | 0         | 0        | 0        | 0        | 0        | 1         | 2         | 1         | 7     |
| <i>Sorghum bicolor</i> SORBIDRAFT 08g003210 NC 012877 | <i>RCN1</i> | 0        | 0        | 0        | 0        | 0        | 0        | 0        | 0        | 0        | 0        | 0        | 0        | 0         | 1         | 1         | 0        | 0        | 0        | 0        | 0        | 0        | 0        | 0        | 0        | 0         | 0         | 0        | 0        | 0         | 0        | 0        | 0        | 0        | 2         | 1         | 0         | 5     |
| <i>Brachypodium distachyon</i> LOC100844217 NC 016134 | <i>RCN1</i> | 0        | 0        | 0        | 0        | 0        | 0        | 0        | 0        | 0        | 0        | 0        | 0        | 1         | 1         | 0         | 0        | 0        | 0        | 0        | 0        | 0        | 0        | 0        | 0        | 0         | 1         | 0        | 0        | 0         | 0        | 0        | 0        | 0        | 0         | 1         | 0         | 4     |
| <i>Oryza sativa</i> Os12g0151900 NC 008404.2          | <i>RCN1</i> | 0        | 0        | 0        | 0        | 0        | 0        | 1        | 0        | 0        | 0        | 0        | 0        | 0         | 1         | 0         | 0        | 0        | 0        | 0        | 0        | 0        | 0        | 0        | 0        | 0         | 1         | 0        | 0        | 0         | 0        | 0        | 0        | 0        | 0         | 1         | 1         | 5     |
| <i>Setaria italica</i> CEN NW 004675967.1             | <i>RCN2</i> | 0        | 1        | 0        | 0        | 0        | 0        | 0        | 0        | 0        | 0        | 0        | 0        | 0         | 1         | 1         | 0        | 0        | 0        | 0        | 0        | 0        | 0        | 0        | 0        | 0         | 0         | 0        | 0        | 0         | 1        | 0        | 0        | 0        | 0         | 3         | 0         | 7     |
| <i>Sorghum bicolor</i> SORBIDRAFT 06g015490 NC 012875 | <i>RCN2</i> | 0        | 1        | 0        | 0        | 0        | 0        | 0        | 0        | 0        | 0        | 0        | 0        | 0         | 0         | 2         | 0        | 0        | 0        | 0        | 0        | 0        | 0        | 0        | 0        | 0         | 0         | 0        | 1        | 0         | 0        | 0        | 0        | 0        | 0         | 3         | 0         | 7     |
| <i>Oryza sativa</i> Os04g0411400 NC 008397            | <i>RCN2</i> | 0        | 1        | 0        | 0        | 0        | 0        | 0        | 0        | 0        | 0        | 0        | 0        | 0         | 6         | 1         | 0        | 0        | 0        | 0        | 0        | 0        | 0        | 0        | 0        | 0         | 0         | 0        | 0        | 2         | 0        | 0        | 0        | 0        | 2         | 4         | 0         | 16    |
| <i>Brachypodium distachyon</i> LOC100835593 NC 016135 | <i>RCN2</i> | 0        | 0        | 0        | 0        | 0        | 0        | 0        | 0        | 0        | 0        | 0        | 0        | 0         | 2         | 0         | 0        | 0        | 0        | 0        | 0        | 1        | 0        | 0        | 0        | 0         | 1         | 0        | 0        | 1         | 0        | 0        | 0        | 0        | 1         | 3         | 1         | 10    |
| <i>Brachypodium distachyon</i> LOC100844906 NC 016133 | <i>RCN3</i> | 0        | 0        | 0        | 0        | 0        | 0        | 0        | 0        | 0        | 0        | 0        | 0        | 1         | 4         | 0         | 0        | 0        | 0        | 0        | 0        | 0        | 0        | 0        | 0        | 0         | 1         | 0        | 0        | 0         | 0        | 0        | 0        | 0        | 0         | 2         | 0         | 8     |
| <i>Oryza sativa</i> Os02g0531600 NC 008395.2          | <i>RCN3</i> | 0        | 0        | 0        | 0        | 0        | 0        | 0        | 0        | 0        | 0        | 0        | 0        | 0         | 2         | 5         | 0        | 0        | 0        | 0        | 0        | 0        | 0        | 0        | 0        | 0         | 0         | 0        | 0        | 0         | 0        | 0        | 0        | 0        | 0         | 5         | 2         | 14    |
| <i>Setaria italica</i> CEN NW 004675961               | <i>RCN3</i> | 0        | 0        | 0        | 0        | 0        | 0        | 0        | 0        | 0        | 0        | 0        | 0        | 0         | 1         | 0         | 0        | 0        | 0        | 1        | 0        | 0        | 0        | 0        | 0        | 0         | 0         | 0        | 0        | 1         | 1        | 0        | 0        | 0        | 0         | 3         | 0         | 7     |
| <i>Sorghum bicolor</i> SORBIDRAFT 04g021650 NC 012873 | <i>RCN3</i> | 0        | 0        | 0        | 0        | 0        | 0        | 0        | 0        | 0        | 0        | 0        | 0        | 2         | 1         | 0         | 0        | 0        | 0        | 0        | 0        | 0        | 0        | 0        | 0        | 0         | 0         | 0        | 1        | 0         | 0        | 0        | 0        | 0        | 1         | 1         | 0         | 6     |
| <i>Amborella trichopoda</i> TFL1 GSVIVT01033829001    | basal       | 0        | 0        | 0        | 0        | 0        | 0        | 0        | 0        | 0        | 0        | 1        | 0        | 2         | 4         | 2         | 0        | 0        | 0        | 0        | 0        | 0        | 0        | 0        | 0        | 0         | 1         | 0        | 0        | 1         | 0        | 0        | 0        | 0        | 4         | 4         | 0         | 19    |
| <b>Total</b>                                          |             | <b>4</b> | <b>7</b> | <b>1</b> | <b>3</b> | <b>0</b> | <b>0</b> | <b>5</b> | <b>0</b> | <b>0</b> | <b>3</b> | <b>5</b> | <b>0</b> | <b>16</b> | <b>75</b> | <b>29</b> | <b>3</b> | <b>2</b> | <b>1</b> | <b>4</b> | <b>2</b> | <b>1</b> | <b>0</b> | <b>1</b> | <b>2</b> | <b>2</b>  | <b>19</b> | <b>1</b> | <b>4</b> | <b>14</b> | <b>7</b> | <b>0</b> | <b>0</b> | <b>2</b> | <b>28</b> | <b>89</b> | <b>26</b> |       |

I1, I2, I3 indicate the intron 1, intron 2, and intron 3, respectively.

<sup>a</sup> LFY binding site

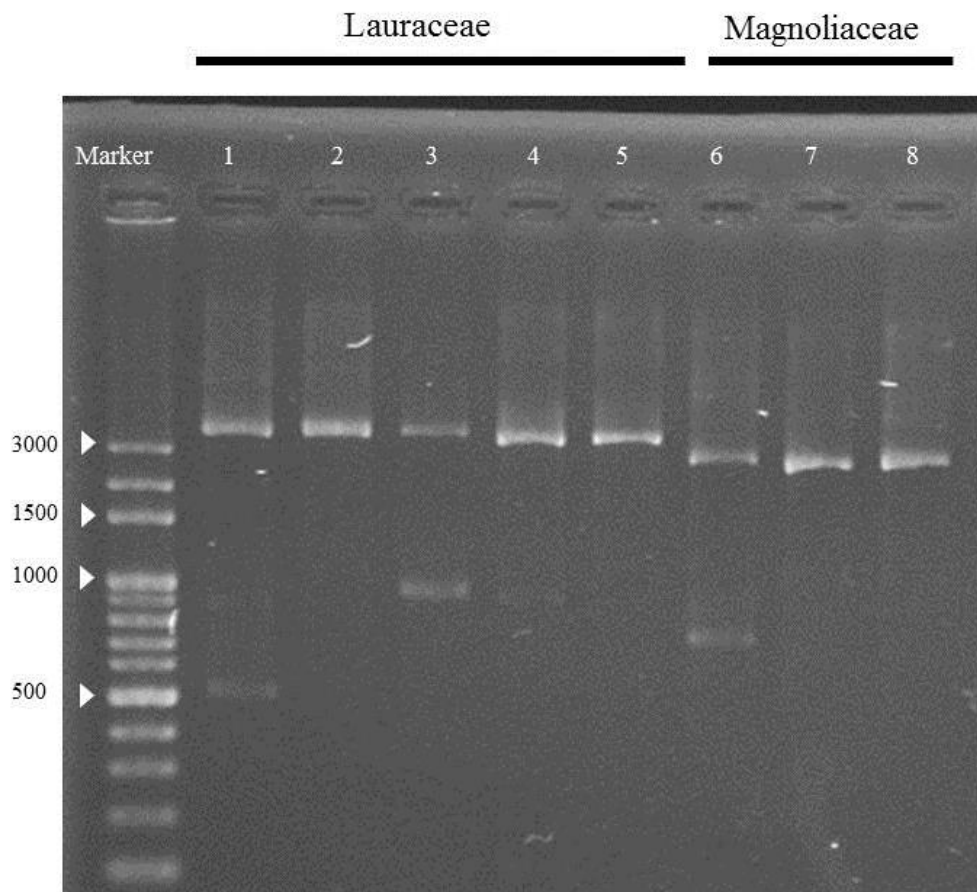

**Figure S1** PCR products amplified from Lauraceae and Magnoliaceae member using primers of *TFL1*-like. Marker: 100-bp ladder. 1: *Machilus japonica*; 2: *Machilus obovatifolia*; 3: *Cinnamomum kanehirai*; 4: *Cinnamomum macrostemon*; 5: *Persea americana*; 6: *Parakmeria yunnanensis*; 7: *Michelia figo*; 8. *Magnolia denudate*. Arrows indicated different size (bp). Bands with size lower than 1000-bp are non-specific product.

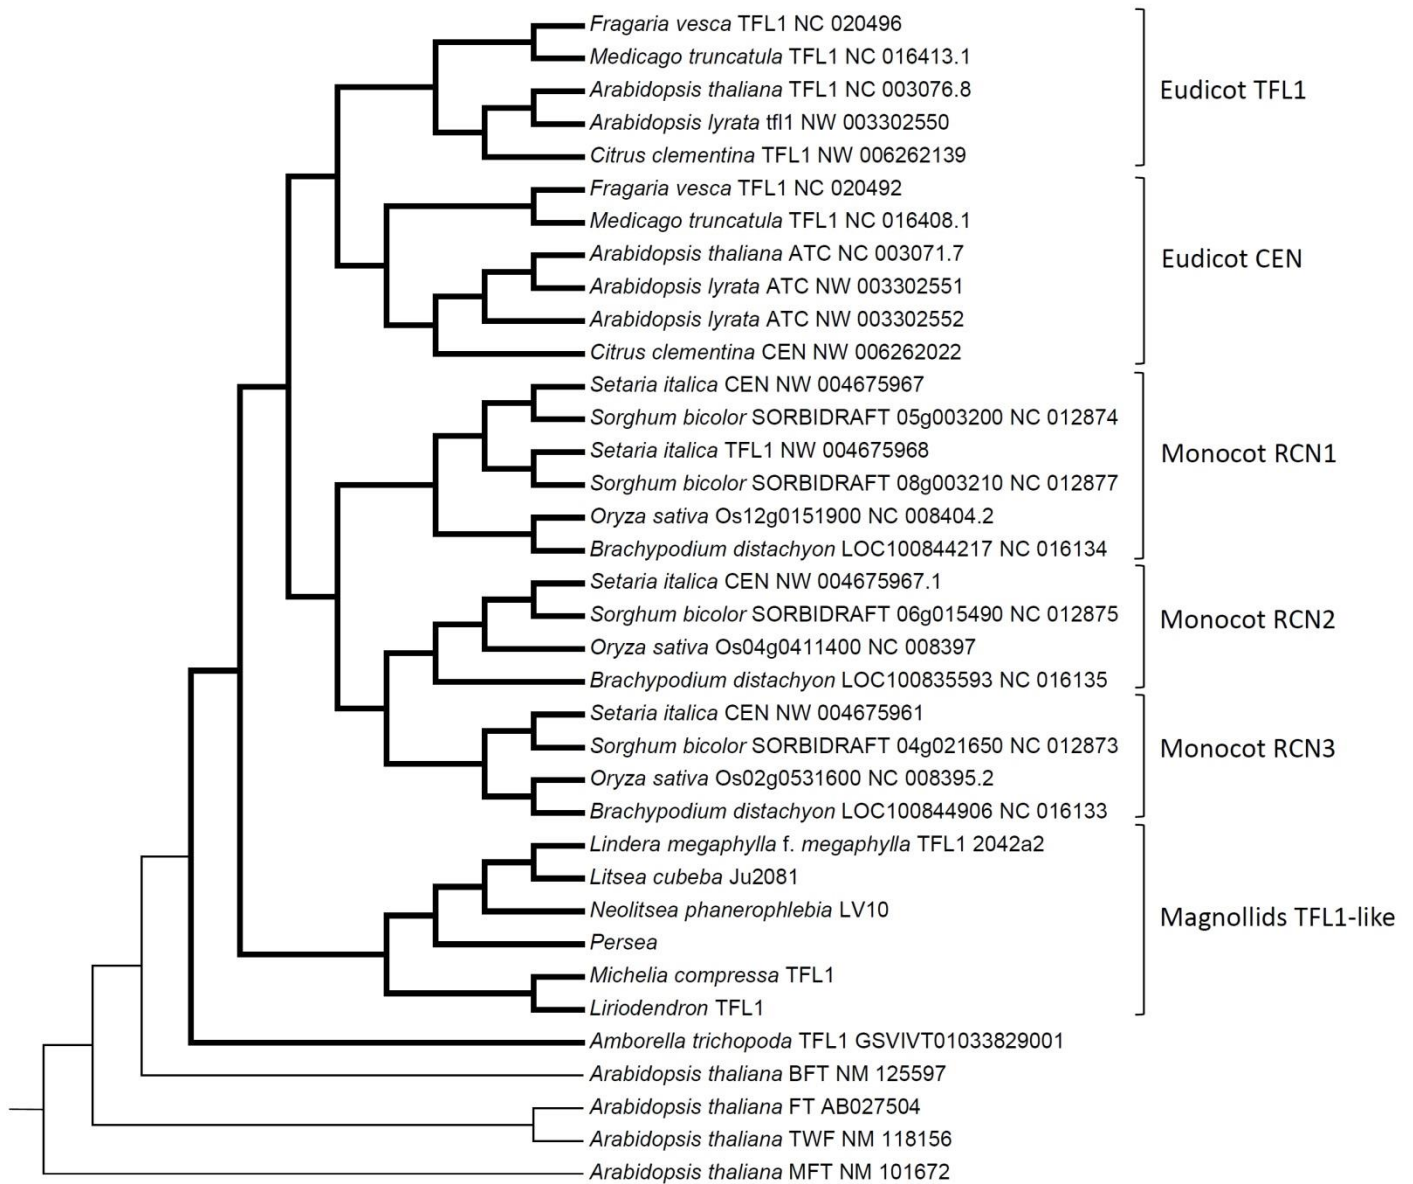

**Figure S2** Hypothetical tree topology of angiosperm *TFL1/CEN/RCNs* paralogs. The full tree was used for the DIVERGE analysis and the bold portion was used as the prior for PAML analysis.



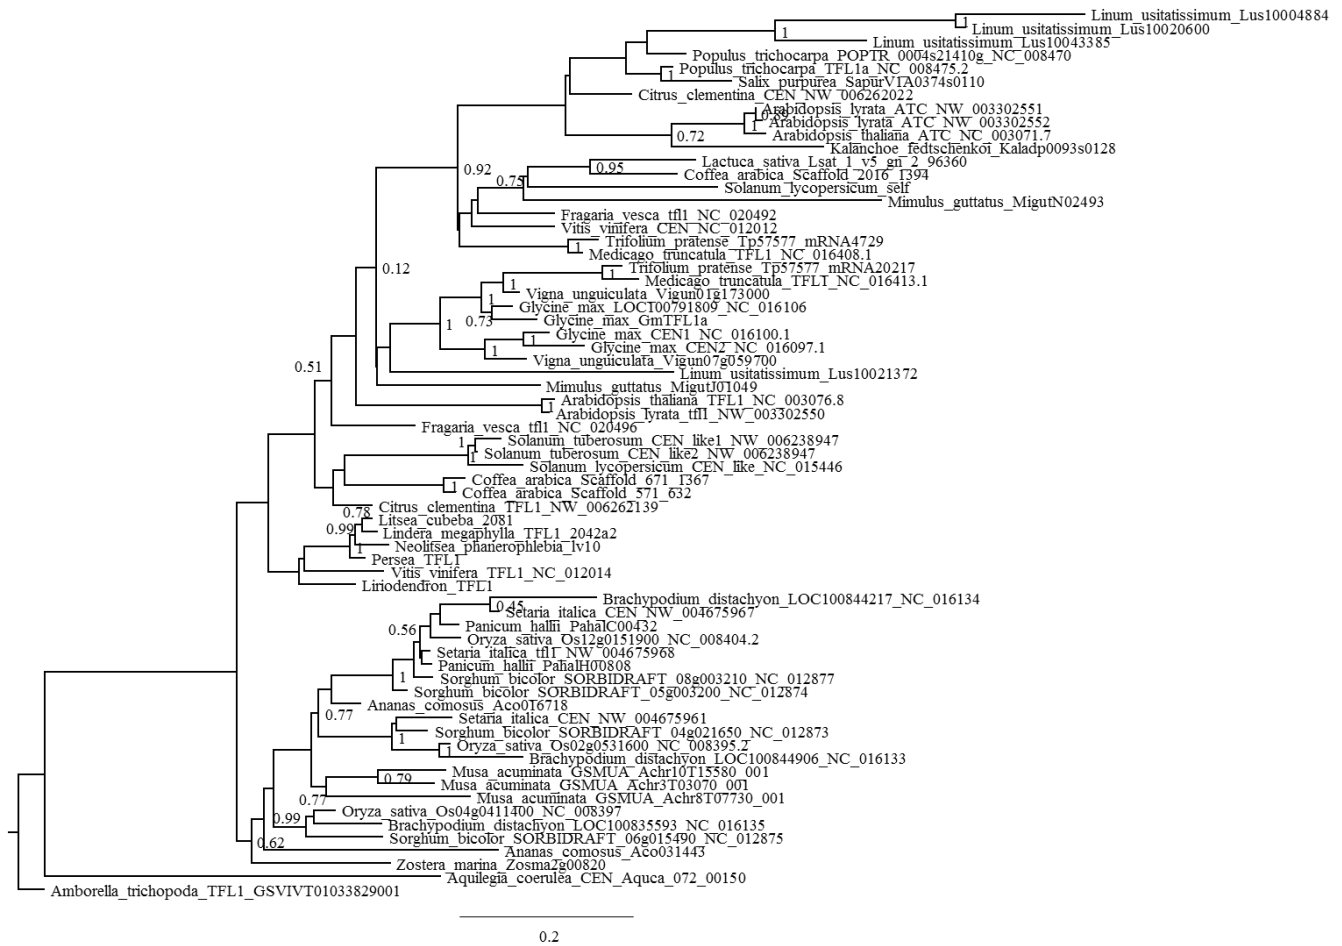

**Figure S3** Gene tree of angiosperm *TFL1/CEN/RCNs* paralogs reconstructed by Bayesian inference. Values of the nodes are posterior probabilities for branch supports.
